# Supplementary material for: Addition of Immune Checkpoint Inhibitors to Chemotherapy vs Chemotherapy Alone as First-Line Treatment in Extensive-Stage Small-Cell Lung Carcinoma: A Systematic Review and Meta-Analysis
Source: PubMed Central journal article supplement — Oncol Ther. 2022 Jan 15;10(1):167–84. doi: 10.1007/s40487-021-00182-0 (PMC9098752; doi:10.1007/s40487-021-00182-0), 2022-01-15

## Supplementary material

### **Addition of immune checkpoint inhibitors to chemotherapy vs chemotherapy alone as first-line treatment in extensive-stage small-cell lung carcinoma: a systematic review and meta-analysis**

#### **Authors:**

Edurne Arriola<sup>1</sup>, Maria Gonzalez Cao<sup>2</sup>, Manuel Domine<sup>3</sup>, Javier De Castro<sup>4</sup>, Manuel Cobo<sup>5</sup>,  
Reyes Bernabé<sup>6</sup>, Alejandro Navarro<sup>7</sup>, Ivana Sullivan<sup>8</sup>, José Trigo<sup>9</sup>, Joaquín Mosquera<sup>10</sup>,  
Leonardo Crama<sup>11</sup>, Dolores Isla<sup>12</sup>

#### **Affiliations:**

1. Medical Oncology Department, Hospital Universitari del Mar-CIBERONC, Barcelona, Spain; earriola@psmar.cat.
2. Medical Oncology Department (IOR), Hospital Dexeus, Barcelona, Spain; mgonzalezcao@oncorosell.com.
3. Medical Oncology Department, Fundación Jiménez Díaz, Madrid, Spain; mdomine@fjd.es.
4. Medical Oncology Department, Hospital Universitario La Paz, Madrid, Spain; javier.decastro@salud.madrid.org.
5. Inter-Center Medical Oncology Clinical Management Unit, Regional and Virgen de la Victoria University Hospitals, IBIMA, Málaga, Spain; manuelcobodols@yahoo.es.
6. Medical Oncology Department, Hospital Virgen del Rocío, Sevilla, Spain; mariar.bernabe.sspa@juntadeandalucia.es.
7. Medical Oncology Department, Vall d'Hebron University Hospital & Vall d'Hebron Institute of Oncology (VHIO), Barcelona, Spain; anavarro@vhio.net.
8. Medical Oncology Department, Hospital de la Santa Creu i Sant Pau, Barcelona, Spain; ISullivan@santpau.cat.
9. Medical Oncology Department, Hospital Virgen de la Victoria, Málaga, Spain; jmtrigo@seom.org.
10. Medical Oncology Department, Hospital Universitario A Coruña, A Coruña, Spain; Joaquin.mosquera.martinez@sergas.es.

11. Medical Department Roche, Madrid, Spain; leonardo.crama@roche.com.
12. Medical Oncology Department, Hospital Universitario Lozano Blesa, Zaragoza, Spain; disla@salud.aragon.es

**Corresponding author:**

Edurne Arriola, Medical Oncology Department, Hospital Universitari del Mar-CIBERONC, Passeig Marítim 25-29, Barcelona 08003, Spain. Email address: earriola@parcdesalutmar.cat.

ORCID: 0000-0001-8960-7519

## Supplementary material

**Table S1.** Search strategy for MEDLINE accessed through PubMed (1966 to 16 July 2020)

| SEARCH | QUERY                                                                                                                                                                                                                                                                                                      | RESULTS    |
|--------|------------------------------------------------------------------------------------------------------------------------------------------------------------------------------------------------------------------------------------------------------------------------------------------------------------|------------|
| #1     | Search: (("Carcinoma, Small Cell"[Mesh] AND "Lung"[Mesh]) OR "Small Cell Lung Carcinoma"[Mesh]) OR (Small-Cell Lung Cancer OR SCLC OR "Lung neoplasm")                                                                                                                                                     | 93,759     |
| #2     | Search: Chemo-naïve OR untreated OR "un-treated" OR "not treated" OR "first line" OR "1st line" OR "1st-line" Sort by: Most Recent                                                                                                                                                                         | 265,438    |
| #3     | Search: #1 AND #2                                                                                                                                                                                                                                                                                          | 6,868      |
| #4     | Search: "atezolizumab" [Supplementary Concept] OR (anti-PDL1 OR immunoglobulin G1, anti-(human CD antigen CD274) (human monoclonal MDPL3280a heavy chain), disulfide with human monoclonal MDPL3280a kappa-chain, dimer OR MPDL3280A OR MPDL-3280A OR Tecentriq OR RG7446 OR RG-7446) Sort by: Most Recent | 1,136      |
| #5     | Search: "durvalumab" [Supplementary Concept] OR (MEDI4736 OR MEDI-4736 OR Imfinzi) Sort by: Most Recent                                                                                                                                                                                                    | 545        |
| #6     | Search: "pembrolizumab" [Supplementary Concept] OR (SCH-900475 OR Keytruda MK-3475 OR lambrolizumab) Sort by: Most Recent                                                                                                                                                                                  | 4,086      |
| #7     | Search: "Nivalumab" [Mesh] OR (Opdivo OR ONO-4538 OR ONO 4538 OR ONO4538 OR MDX-1106 OR MDX 1106 OR MDX1106 OR BMS-936558 OR BMS 936558 OR BMS936558) Sort by: Most Recent                                                                                                                                 | 5,147      |
| #8     | Search: "Ipilimumab" [Mesh] OR (Anti-CTLA-4 MAb Ipilimumab OR Anti CTLA 4 MAb Ipilimumab OR Ipilimumab, Anti-CTLA-4 MAb OR Yervoy OR MDX 010 MDX010 OR MDX-010 OR MDX-CTLA-4 OR MDX CTLA 4) Sort by: Most Recent                                                                                           | 10,061     |
| #9     | Search: #4 OR #5 OR #6 OR #7 OR #8                                                                                                                                                                                                                                                                         | 16,32      |
| #10    | Search: #3 AND #9                                                                                                                                                                                                                                                                                          | <b>383</b> |

**Table S2.** Search strategy for EMBASE (1980 to 17 July 2020)

| <b>SEARCH</b> | <b>QUERY</b>                                                                                                  | <b>RESULTS</b> |
|---------------|---------------------------------------------------------------------------------------------------------------|----------------|
| #1.           | <i>small cell lung cancer'/exp OR 'small cell lung cancer'</i>                                                | 154,361        |
| #2.           | <i>Sclc</i>                                                                                                   | 13,126         |
| #3.           | <i>'pembrolizumab'/exp OR 'pembrolizumab'</i>                                                                 | 15,875         |
| #4.           | <i>'nivolumab'/exp OR 'nivolumab'</i>                                                                         | 18,248         |
| #5.           | <i>'ipilimumab'/exp OR 'ipilimumab'</i>                                                                       | 14,42          |
| #6.           | <i>'durvalumab'/exp OR 'durvalumab'</i>                                                                       | 3,771          |
| #7.           | <i>'atezolizumab'/exp OR 'atezolizumab'</i>                                                                   | 5,578          |
| #8.           | <i>chemo naïve' OR untreated OR 'un-treated' OR 'not treated' OR 'first line' OR '1st line' OR '1st-line'</i> | 394,911        |
| #9.           | <i>#1 OR #2</i>                                                                                               | 155,621        |
| #10.          | <i>#8 AND #9</i>                                                                                              | 13,699         |
| #11.          | <i>#3 OR #4 OR #5 OR #6 OR #7</i>                                                                             | 34,146         |
| #12.          | <i>#10 AND #11</i>                                                                                            | 1,503          |
| #13.          | <i>#12 AND 'randomized controlled trial'/de</i>                                                               | <b>320</b>     |

**Figure S1.** PRISMA flow-chart of study selection

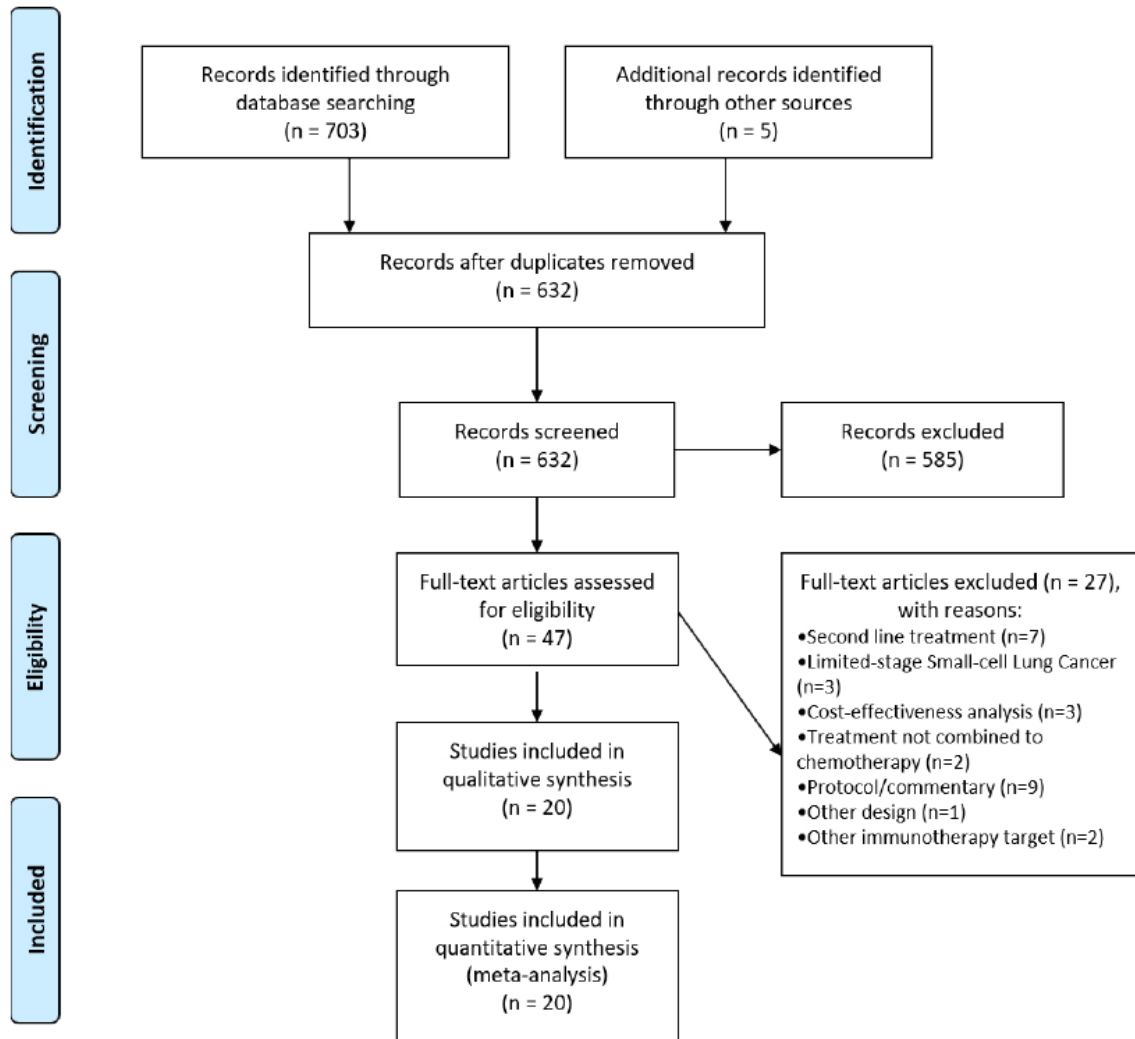

**Figure S2.** Risk of bias summary: authors' judgements about risk of bias for each included study

|                | Random sequence generation (selection bias) | Allocation concealment (selection bias) | Blinding of participants and personnel (performance bias): Overall survival | Blinding of participants and personnel (performance bias): Progression-free survival, response rate and adverse events | Blinding of outcome assessment (detection bias): Overall survival | Blinding of outcome assessment (detection bias): Progression-free survival, response rate and adverse events | Incomplete outcome data (attrition bias) | Selective reporting (reporting bias) | Other bias |
|----------------|---------------------------------------------|-----------------------------------------|-----------------------------------------------------------------------------|------------------------------------------------------------------------------------------------------------------------|-------------------------------------------------------------------|--------------------------------------------------------------------------------------------------------------|------------------------------------------|--------------------------------------|------------|
| Horn 2018      | +                                           | ?                                       | +                                                                           | +                                                                                                                      | +                                                                 | ?                                                                                                            | -                                        | +                                    | -          |
| Owonikoko 2019 | ?                                           | ?                                       | +                                                                           | +                                                                                                                      | +                                                                 | ?                                                                                                            | +                                        | +                                    | +          |
| Paz-Ares 2019  | +                                           | -                                       | +                                                                           | -                                                                                                                      | +                                                                 | -                                                                                                            | +                                        | -                                    | -          |
| Reck 2013      | ?                                           | ?                                       | +                                                                           | +                                                                                                                      | +                                                                 | ?                                                                                                            | -                                        | ?                                    | +          |
| Reck 2016      | +                                           | ?                                       | +                                                                           | +                                                                                                                      | +                                                                 | +                                                                                                            | +                                        | +                                    | -          |
| Rudin 2020     | +                                           | ?                                       | +                                                                           | +                                                                                                                      | +                                                                 | ?                                                                                                            | +                                        | +                                    | -          |

**Figure S3.** Subgroup analysis by age (age <65 years/≥65 years). Forest plot comparison of adverse event rate in patients receiving chemotherapy plus immune checkpoint inhibitors (ICIs) versus chemotherapy alone or combined with placebo. CI, confidence interval; IV, inverse variance; SE standard error.

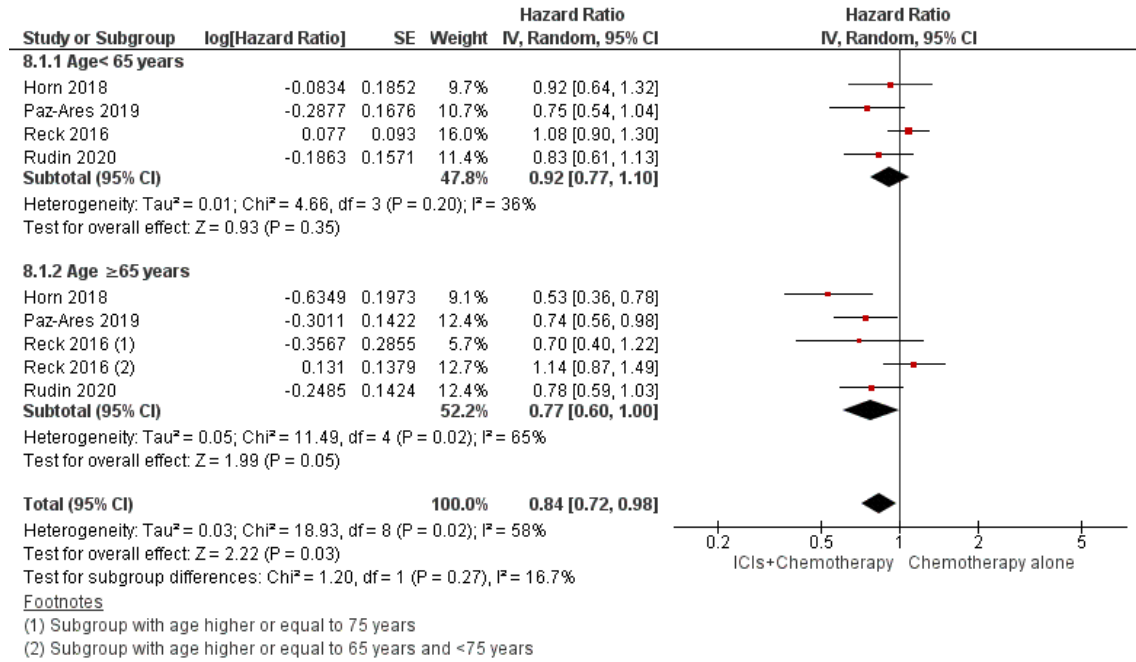

**Figure S4.** Subgroup analysis by sex (male/female). Forest plot comparison of adverse event rate in patients receiving chemotherapy plus immune checkpoint inhibitors (ICIs) versus chemotherapy alone or combined with placebo. CI, confidence interval; IV, inverse variance; SE, standard error.

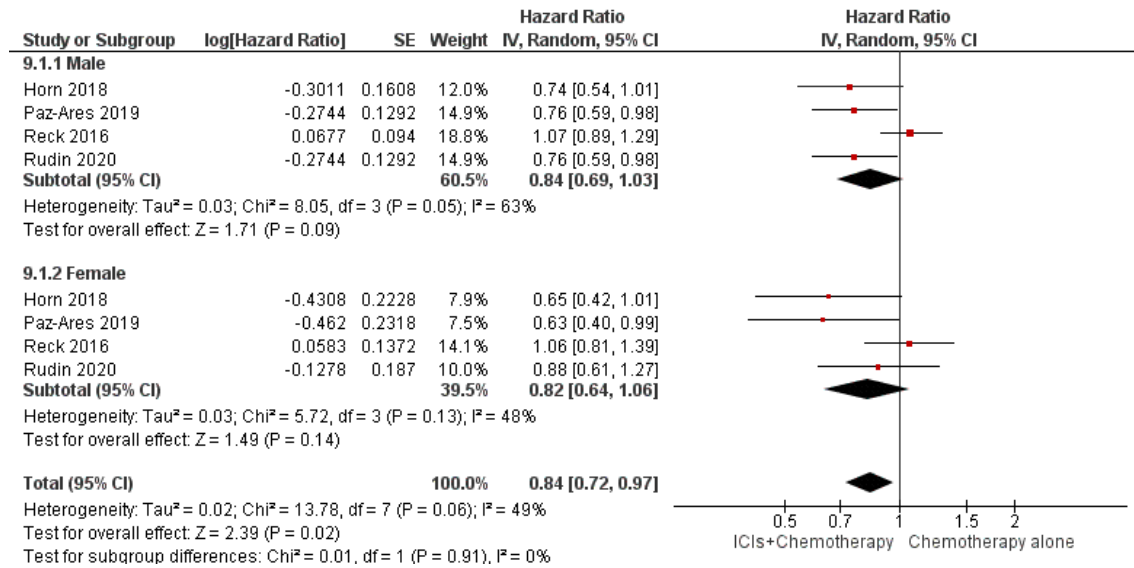



**Figure S5.** Subgroup analysis by baseline functional status. Forest plot comparison of adverse event rate in patients receiving chemotherapy plus immune checkpoint inhibitors (ICIs) versus chemotherapy alone or combined with placebo. CI, confidence interval; ECOG, Eastern Cooperative Oncology Group; IV, inverse variance; SE, standard error; WHO, World Health Organization.

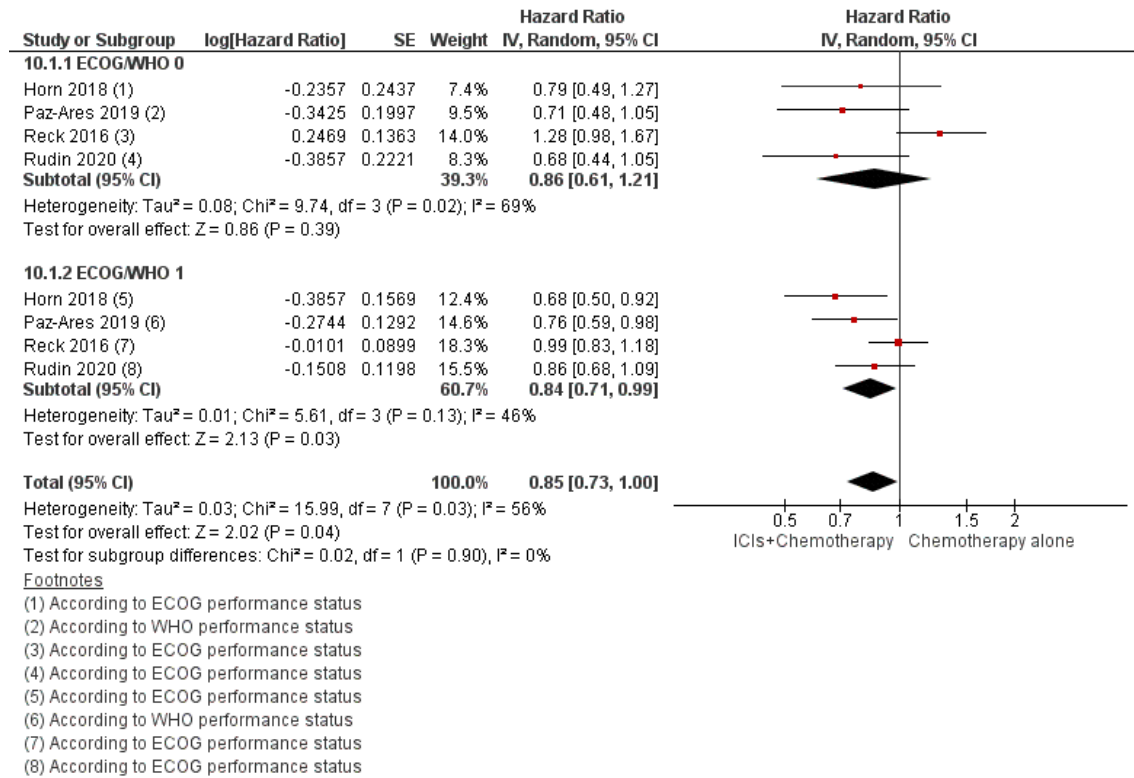

**Figure S6.** Subgroup analysis by serum lactate dehydrogenase (LDH). Forest plot comparison of adverse event rate in patients receiving chemotherapy plus immune checkpoint inhibitors (ICIs) versus chemotherapy alone or combined with placebo. CI, confidence interval; IV, inverse variance; SE, standard error.

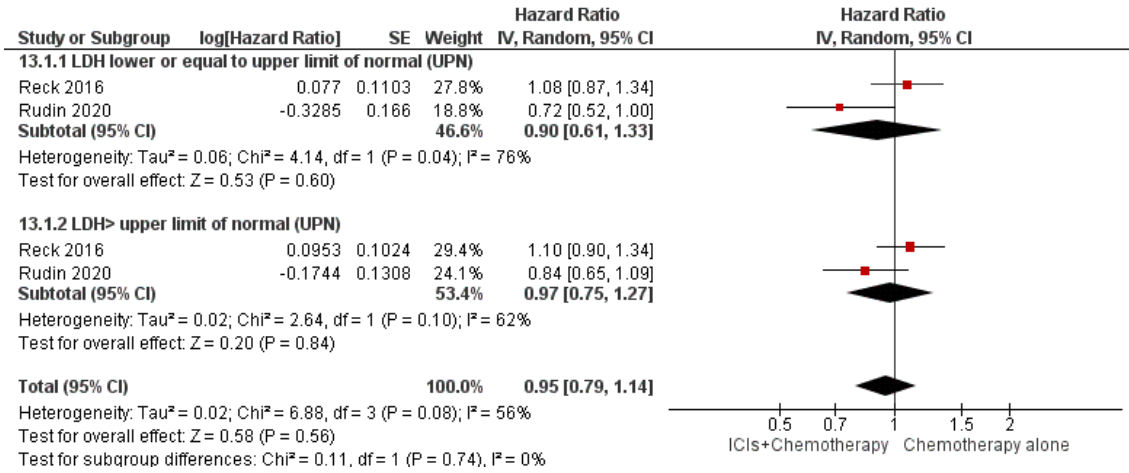

**Figure S7.** Subgroup analysis by brain metastasis at baseline. Forest plot comparison of adverse event rate in patients receiving chemotherapy plus immune checkpoint inhibitors (ICIs) versus chemotherapy alone or combined with placebo. CI, confidence interval; IV, inverse variance; SE, standard error.

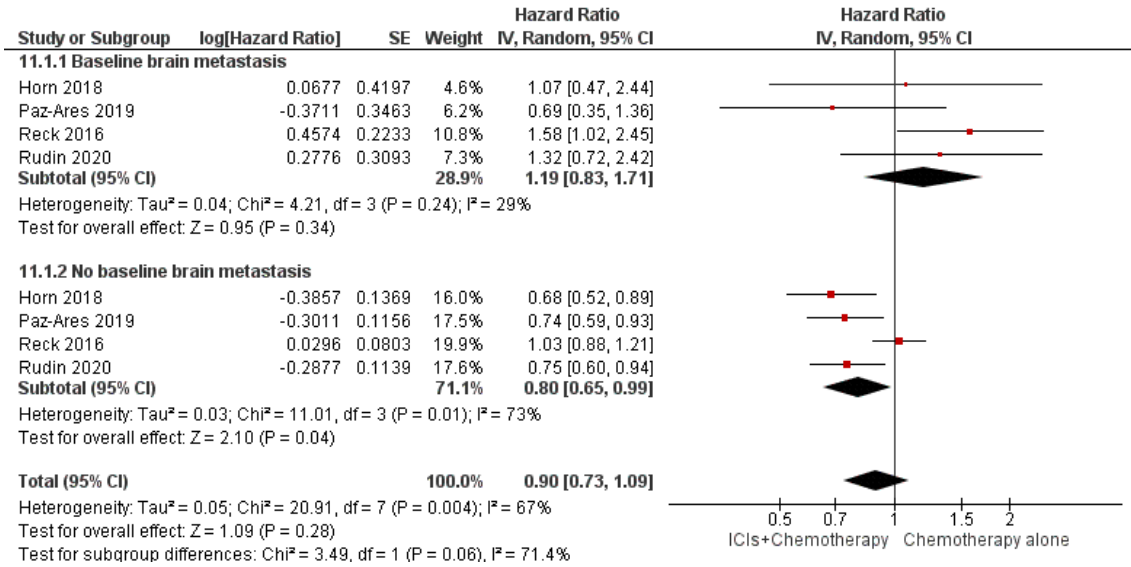

**Figure S8.** Subgroup analysis by baseline liver metastasis. Forest plot comparison of adverse event rate in patients receiving chemotherapy plus immune checkpoint inhibitors (ICIs) versus chemotherapy alone or combined with placebo. CI, confidence interval; IV, inverse variance; SE, standard error.

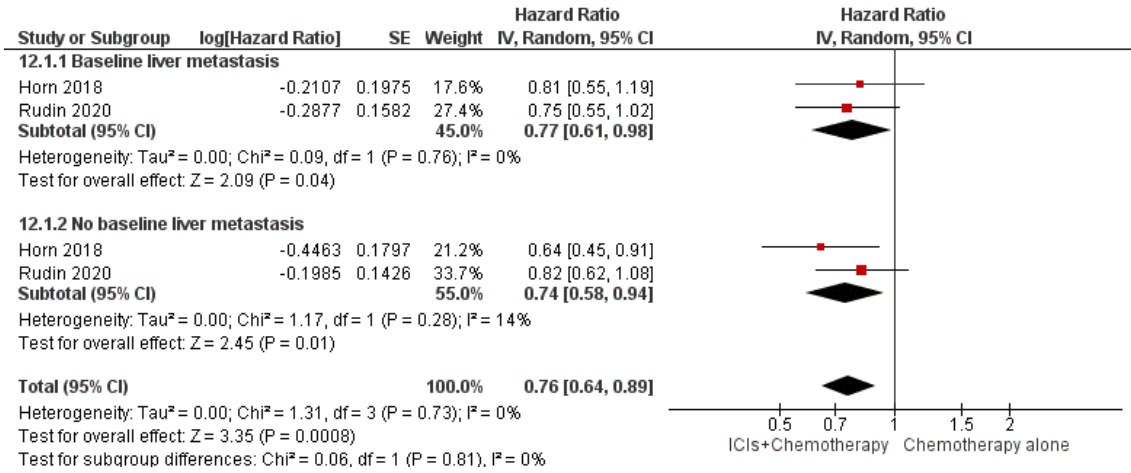

**Figure S9.** Subgroup analysis in longer-term survival. Forest plot comparison of adverse event rate in patients receiving chemotherapy plus immune checkpoint inhibitors (ICIs) versus chemotherapy alone or combined with placebo. CI, confidence interval; M-H, Mantel-Haenszel.

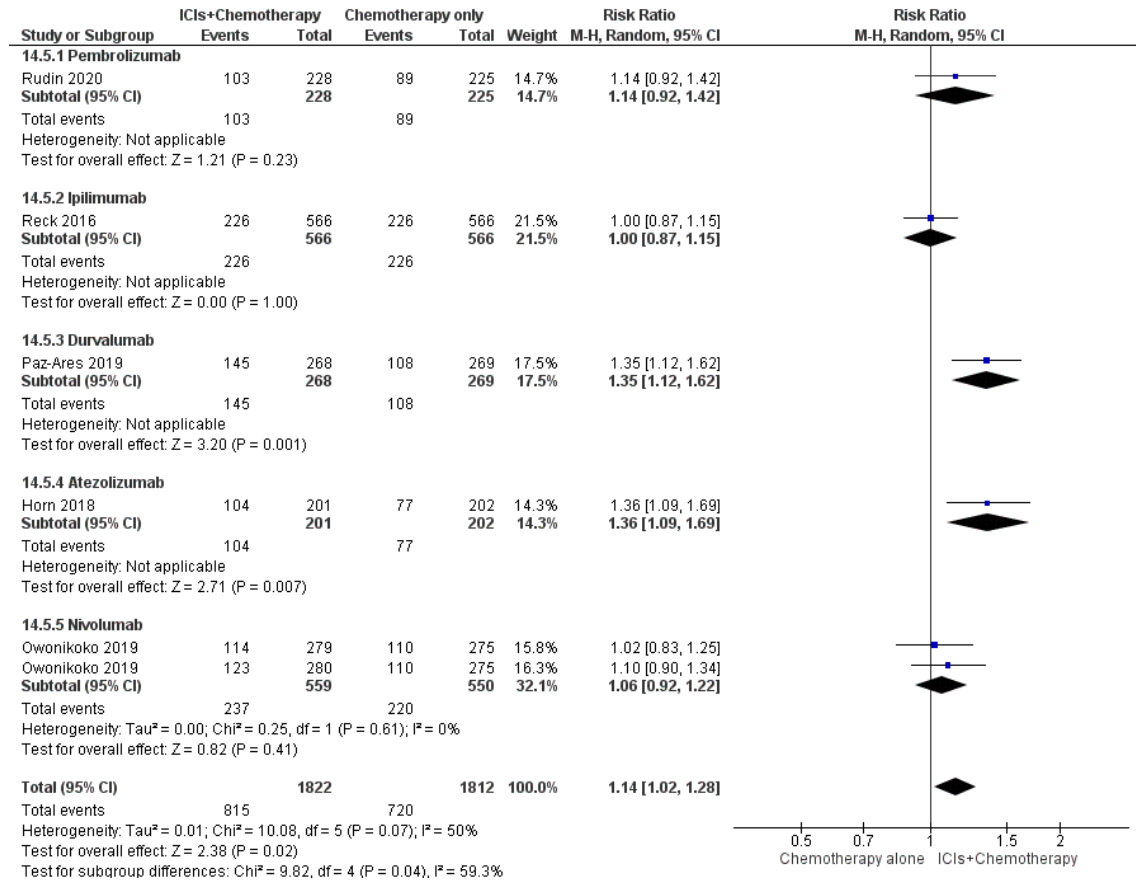

Supplement: 40487_2021_182_MOESM1_ESM.pdf [file 40487_2021_182_MOESM1_ESM.pdf]
